# Supplementary material for: miR-302 Is Required for Timing of Neural Differentiation, Neural Tube Closure, and Embryonic Viability
Source: PubMed Central journal article supplement — Cell Rep. Author manuscript; Available in PMC 2016 Feb 4. (PMC4741278; doi:10.1016/j.celrep.2015.06.074), 2015-07-23
Supplement: NIHMS706414-supplement-1.pdf [file NIHMS706414-supplement-1.pdf]

**Cell Reports**

**Supplemental Information**

**miR-302 is required for timing of neural differentiation, neural tube closure,  
and embryonic viability**

**Ronald J. Parchem, Nicole Moore, Jennifer L. Fish, Jacqueline G. Parchem,  
Tarcio T. Braga, Archana Shenoy, Michael C. Oldham, John L.R. Rubenstein,  
Richard A. Schneider, Robert Blelloch**

Figure 1 - figure supplement 1

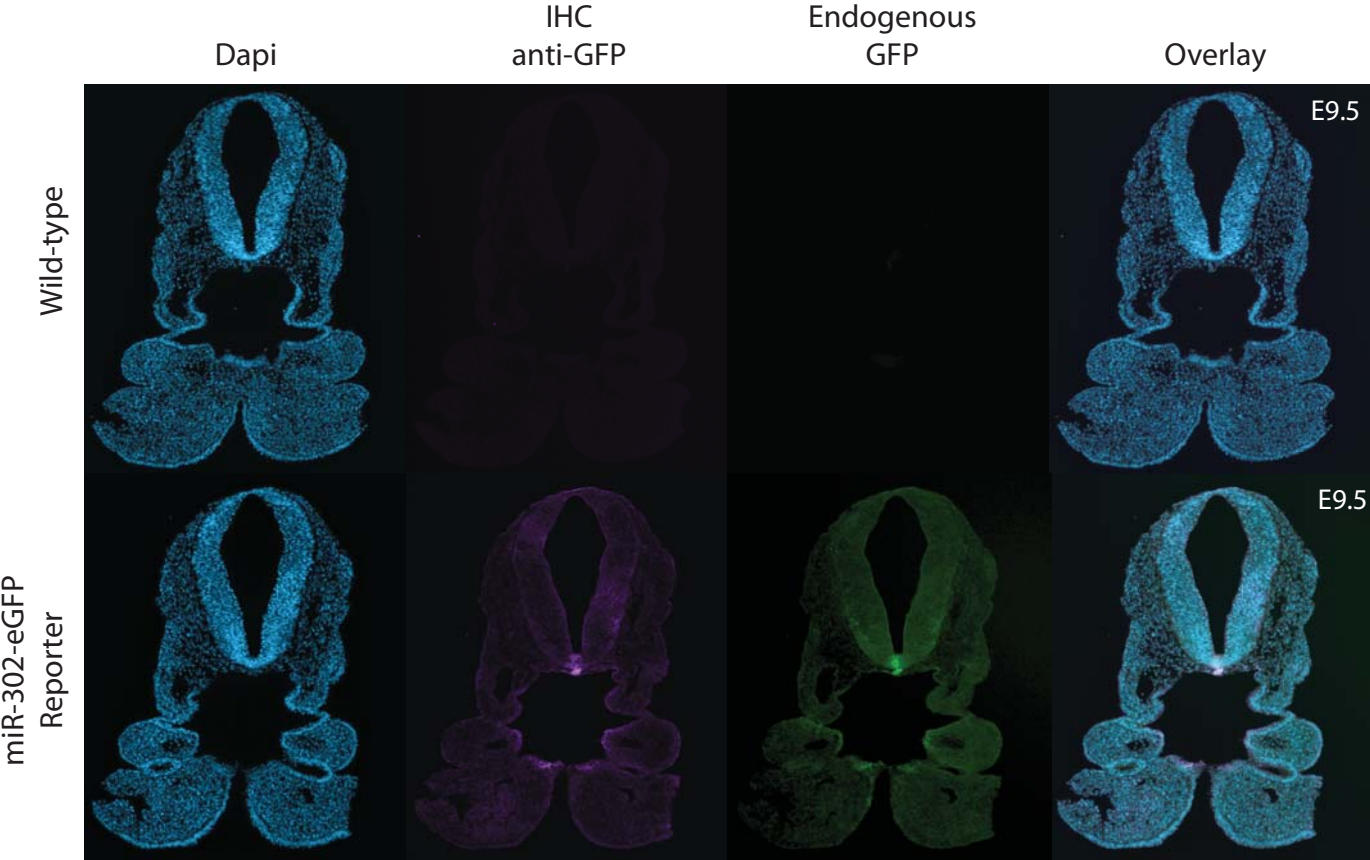

**Figure 1-supplement figure 1:** miR-302 reporter expression. Transverse sections of wild-type and miR-302-eGFP reporter mice at E9.5 stained for GFP expression.

Figure 2 - supplement figure 1

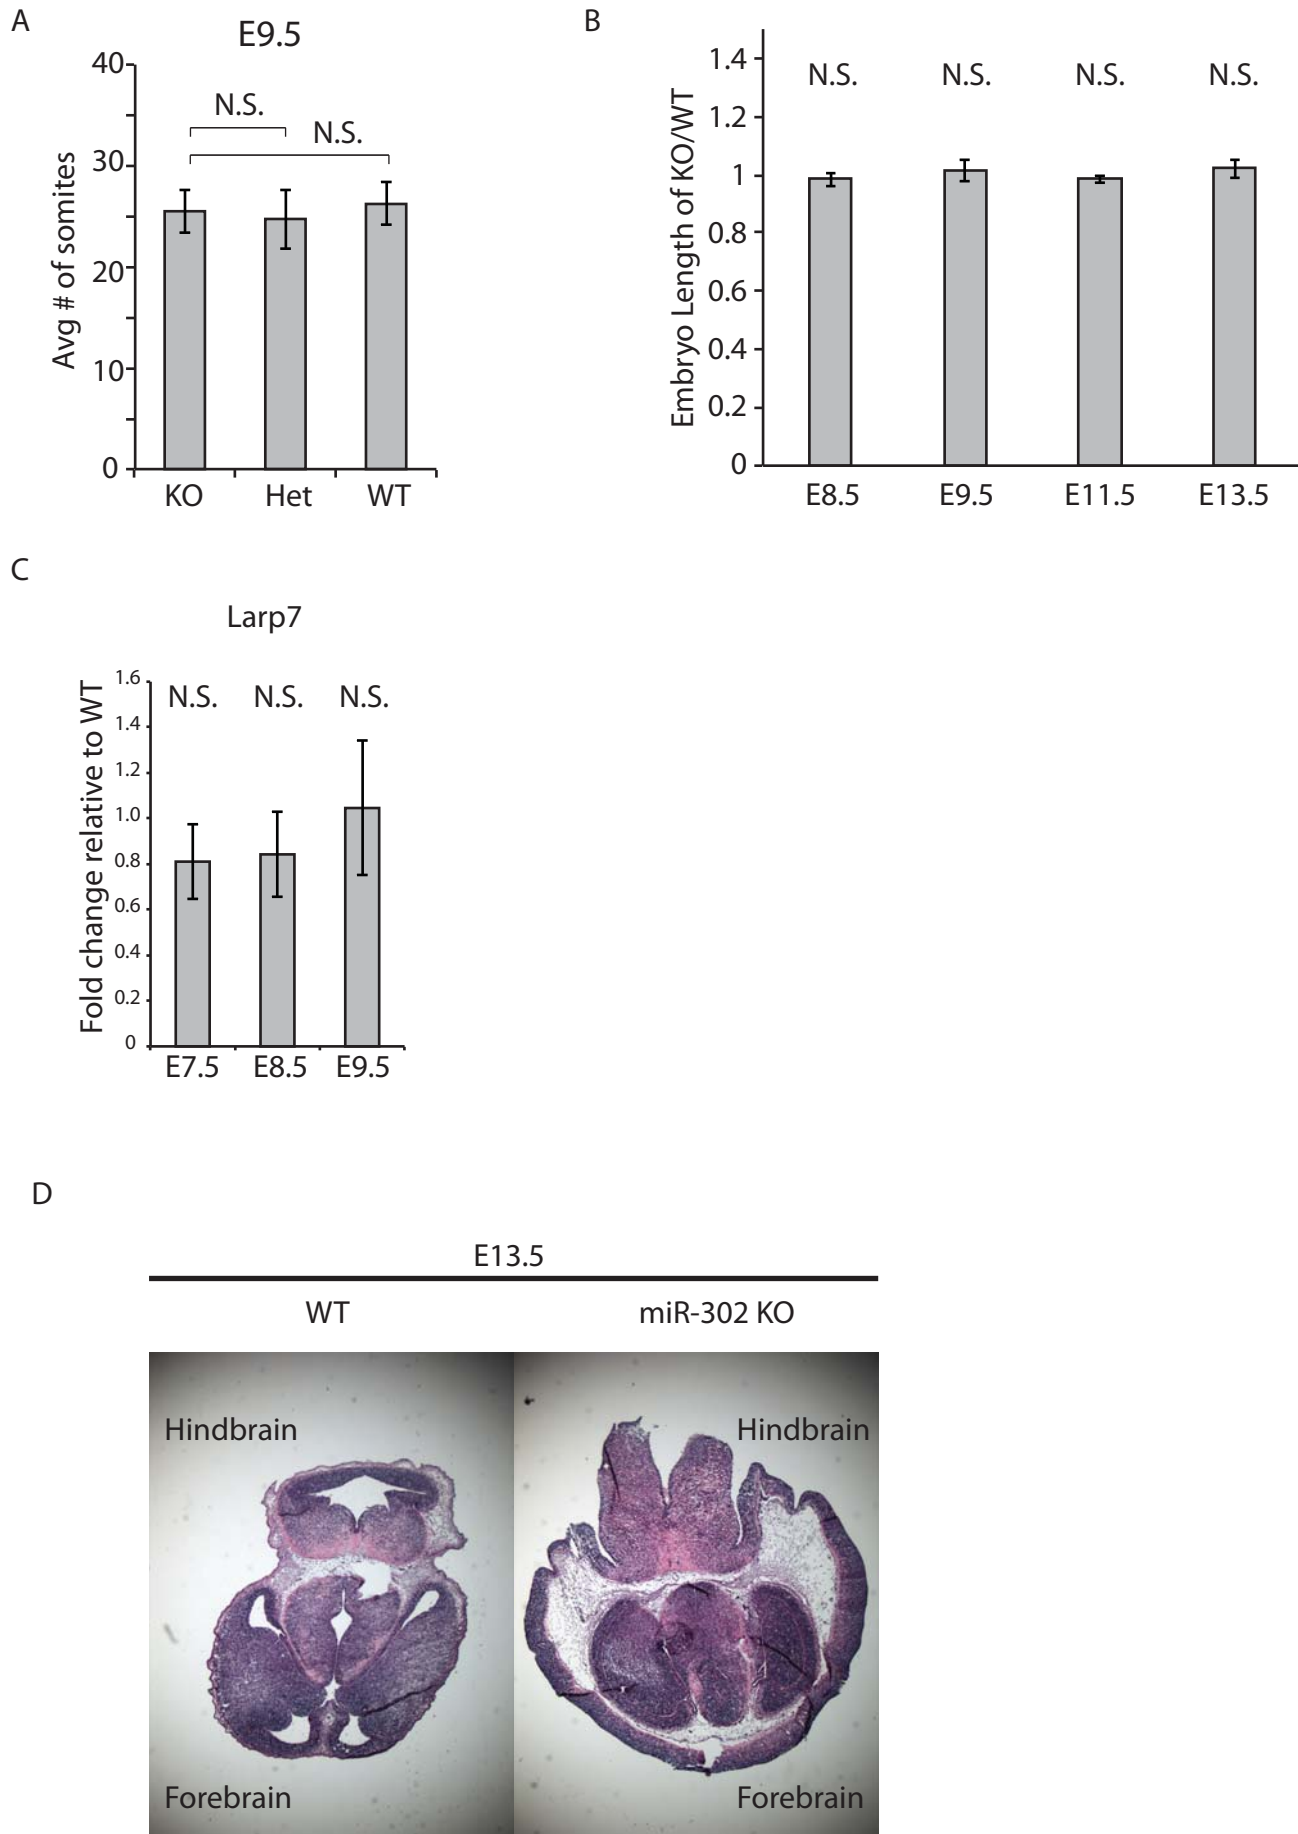

**Figure 2-supplement figure 1:** Phenotypic characterization of miR-302 knockout embryos. **(A)** Average somite number and genotype for litters analyzed at E9.5. **(B)** Average embryo length at indicated developmental stage relative to wildtype littermates. (n=20 litters) **(C)** RT-qPCR of *Larp7* expression normalized to *Rpl7*. (n=3 embryos for each genotype and developmental stage). **(D)** H&E staining of transverse sections at E13.5 showing hindbrains of miR-302 knockout embryos are larger than wildtype.

Figure 3-supplement figure 1

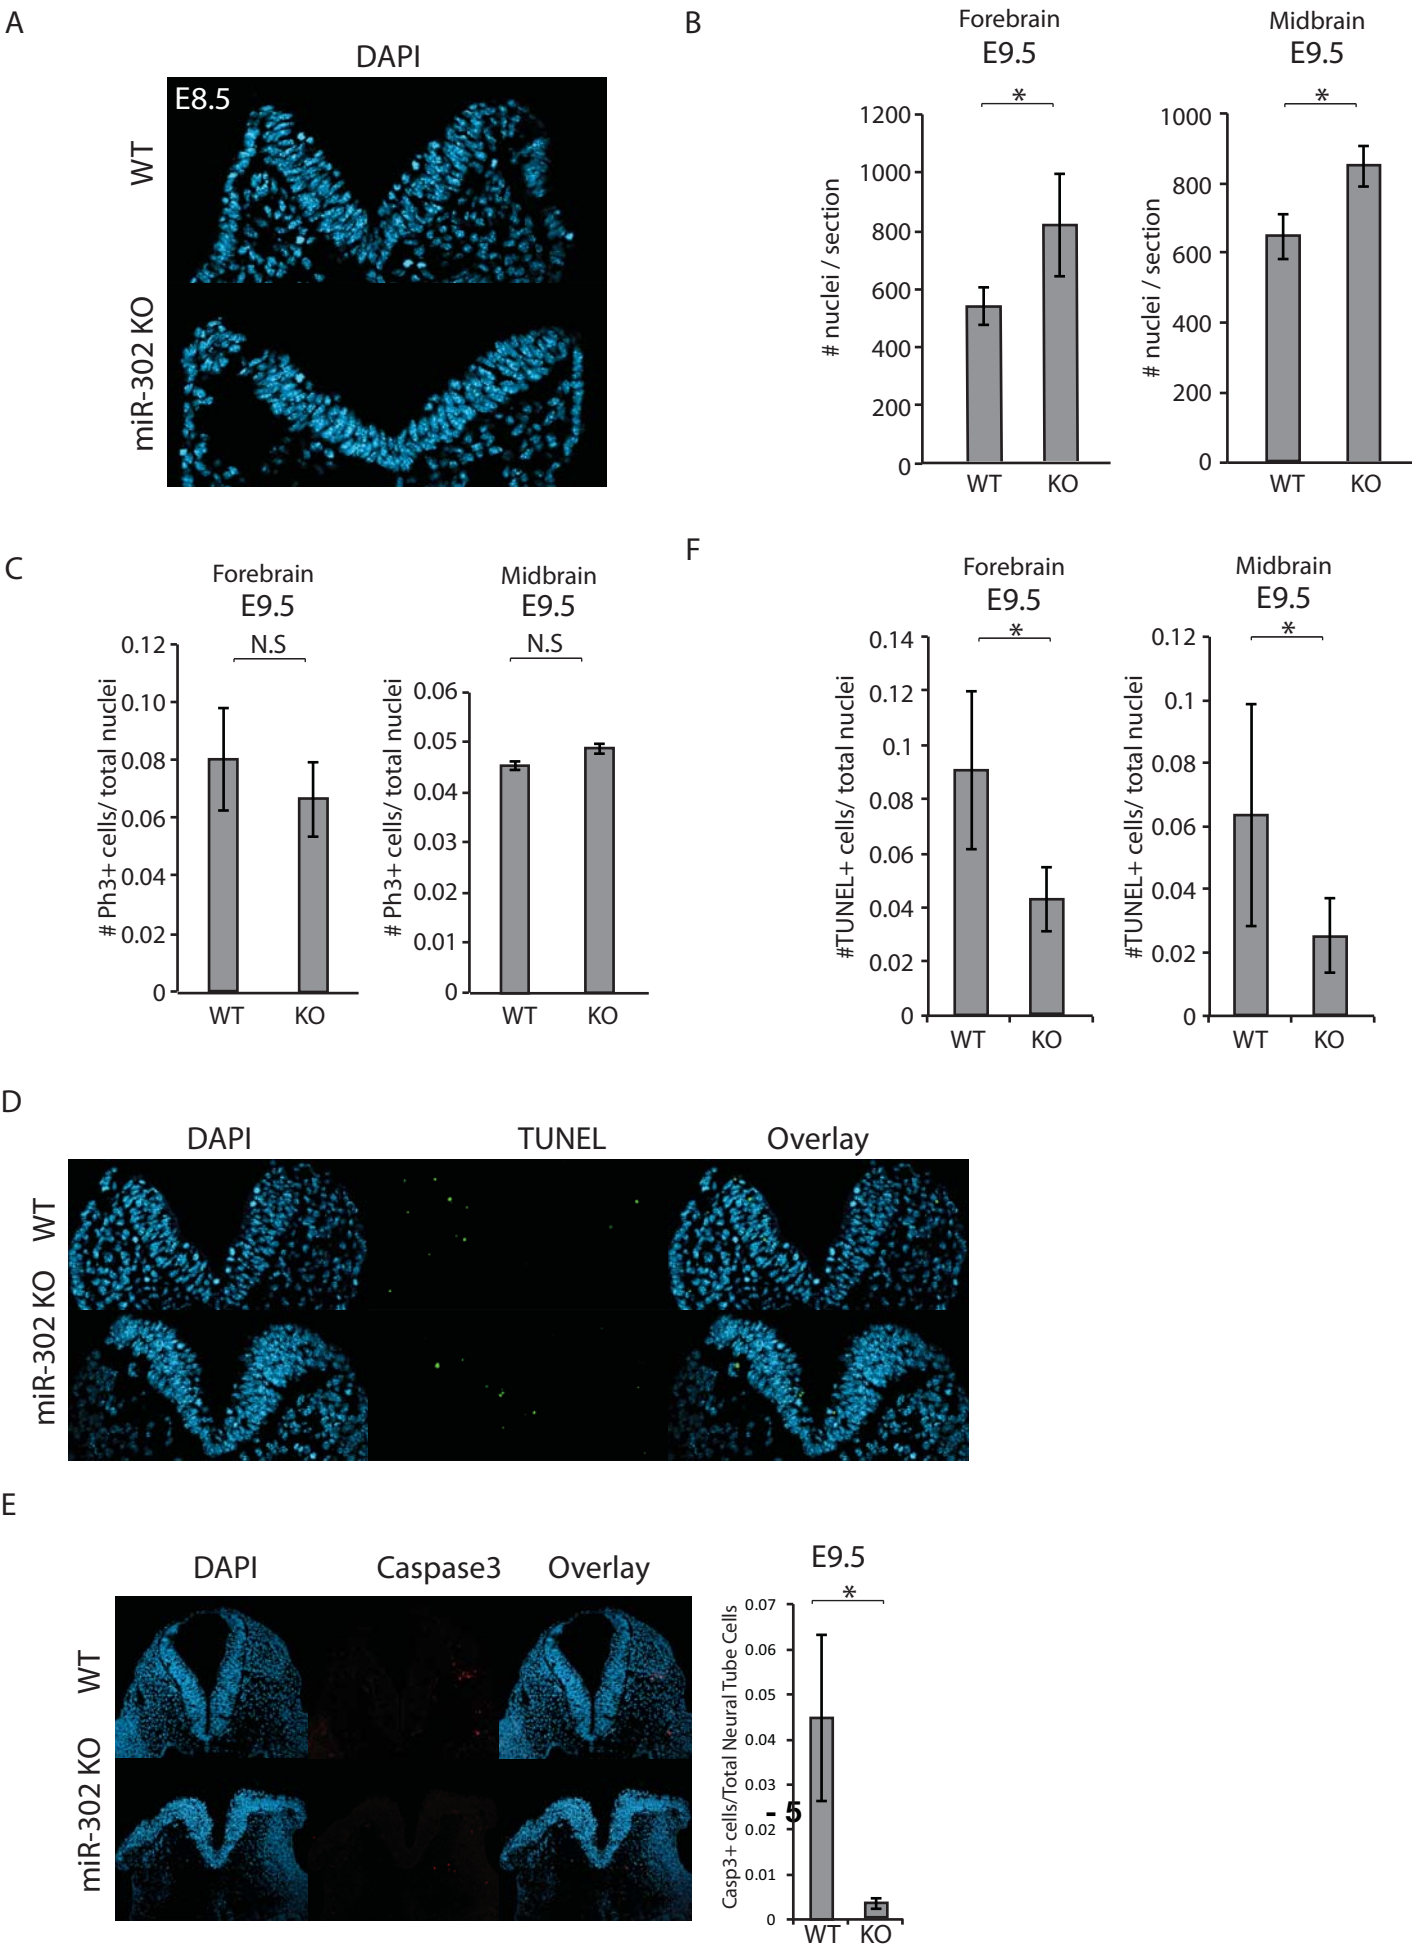

**Figure 3-supplement figure 1:** Cellular analysis of miR-302 knockout embryos. **(A)** Transverse section of developing hindbrain at E8.5 stained for DAPI to identify nuclei. **(B)** Thickening of neuroepithelium in miR-302 knockout embryos. Transverse sections of presumptive forebrain and midbrain at E9.5 were stained for DAPI to identify nuclei. (n=3 embryos, 6 sections/embryo) Error bars represent standard deviation. \*p<0.05, \*\*p<0.005 **(C)** Immunohistochemistry against phospho-histone H3 (pH3) to visualize cells in M-phase of the cell cycle. Quantification of pH3-positive cells was calculated as the percentage of pH3-positive cells out of total neuroepithelial cells at E9.5 in the forebrain and midbrain. Error bars represent standard deviation. (n=3 embryos, 6 sections/embryo). N.S. = not significant **(D)** TUNEL assay was used to identify apoptotic cells in transverse sections of presumptive hindbrain at E8.5. **(E)** Transverse section of presumptive hindbrain at E9.5 stained for Caspase3 to identify apoptotic cells. (n=3 embryos, 6 sections/embryo) Error bars represent standard deviation. \*p<0.05 **(F)** Transverse sections of presumptive forebrain and midbrain at E9.5 were stained for TUNEL to identify apoptotic cells. (n=3 embryos, 6 sections/embryo) Error bars represent standard deviation. \*p<0.05

Figure 4-supplement figure 1

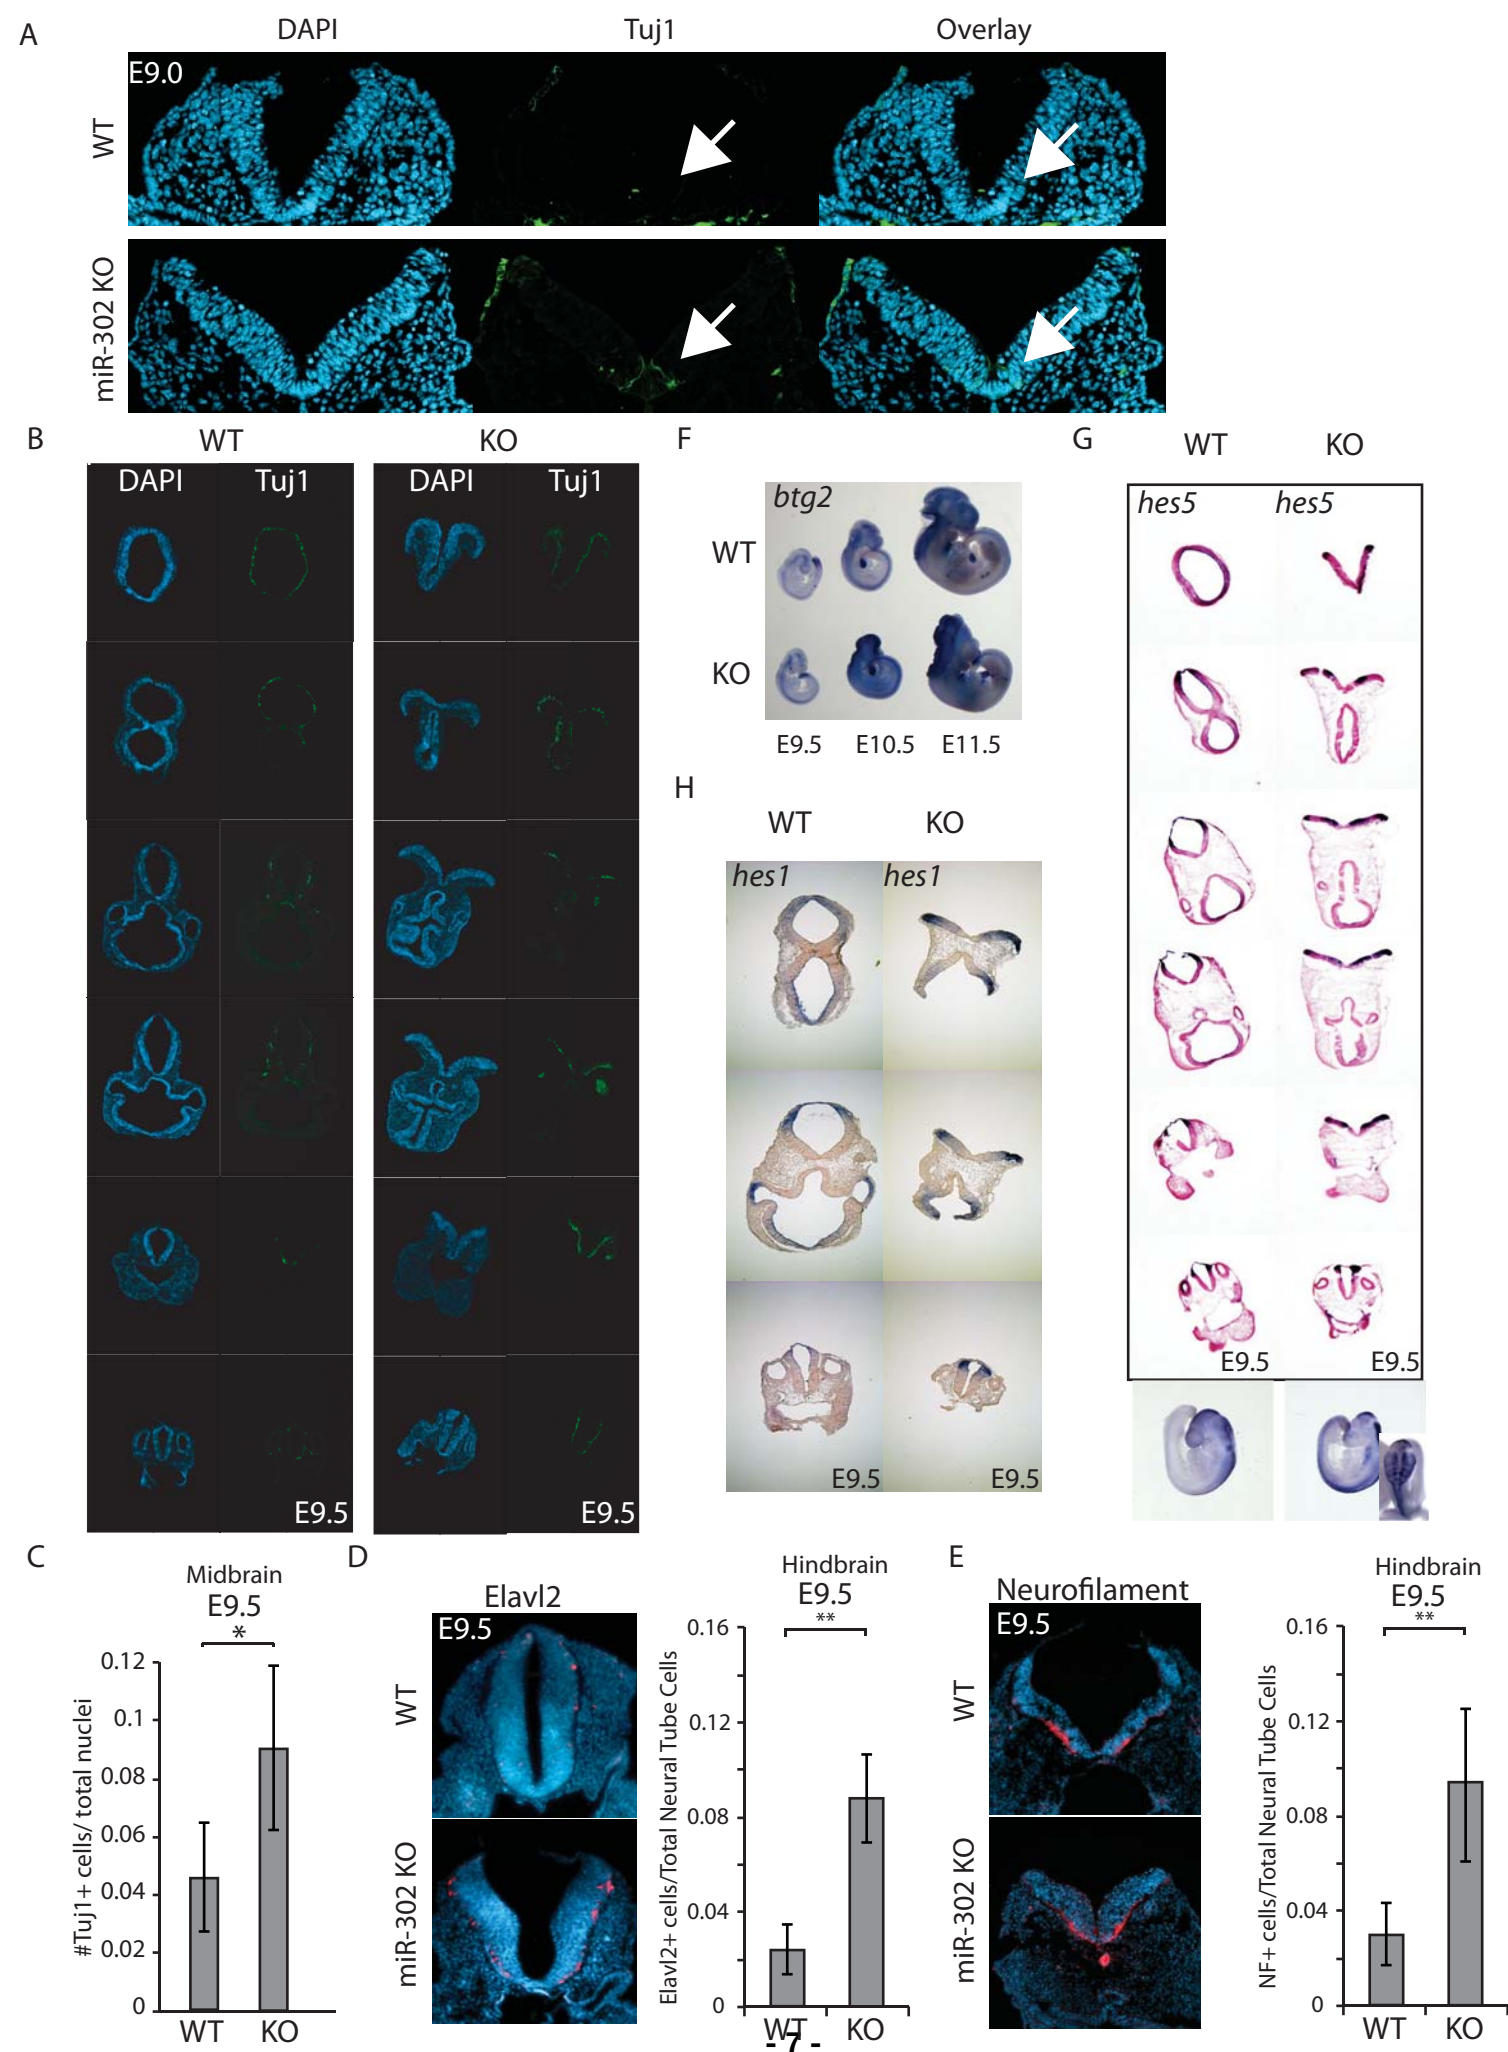

**Figure 4-supplement figure 1:** Differentiation defect in miR-302 knockout embryos. (A) Tuj1 immunohistochemistry was used to visualize post-mitotic neural cells at E9.0. (B) Tuj1 immunohistochemistry was used to visualize post-mitotic neural cells along the rostral-caudal axis. (C) Tuj1 immunohistochemistry to visualize post-mitotic neural cells in the midbrain at E9.5. Quantification of Tuj1+ cells was calculated as the percentage of Tuj1+ cells out of total neuroepithelial cells. Error bars represent standard deviation. (n=3 embryos, 6 sections/embryo). \*p<0.05 (D) Elavl2 immunohistochemistry was used to visualize post-mitotic neural cells. Quantification of Elavl2+ cells was calculated as the percentage of Elavl2+ cells out of total neuroepithelial cells at E9.5. Error bars represent standard deviation. (n=3 embryos, 6 sections/embryo). \*\*p<0.005 (E) Neurofilament immunohistochemistry was used to visualize post-mitotic neural cells. Quantification of NF+ cells was calculated as the percentage of NF+ cells out of total neuroepithelial cells at E9.5. Error bars represent standard deviation. (n=3 embryos, 6 sections/embryo). \*p<0.05 (F) In situ hybridization staining for Btg2 from E9.5-E11.5 in wild-type and knockout embryos. (G) In situ hybridization staining for Hes5 followed by tranverse sectioning along the rostral-caudal axis in wild-type and knockout embryos at E9.5. (H) In situ hybridization staining for Hes1 followed by tranverse sectioning along the rostral-caudal axis in wild-type and knockout embryos at E9.5.



Figure 4-supplement figure 2

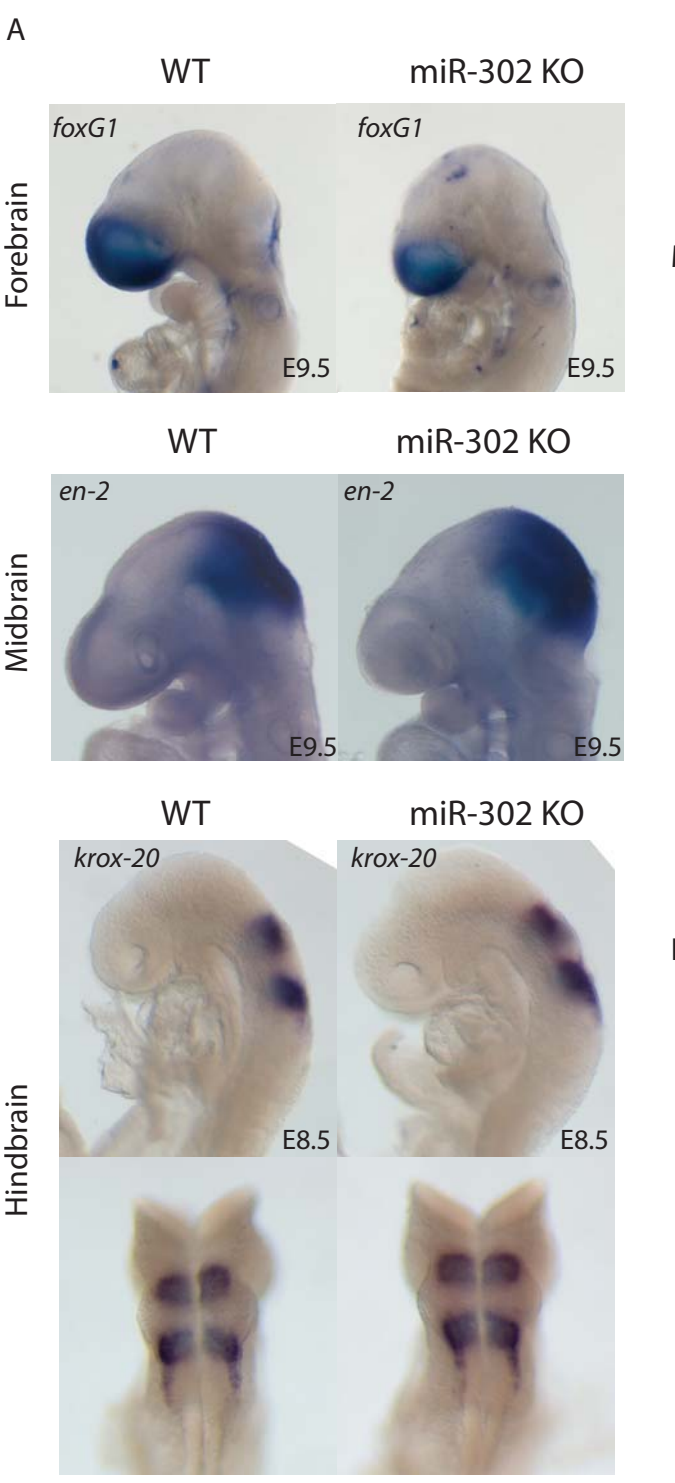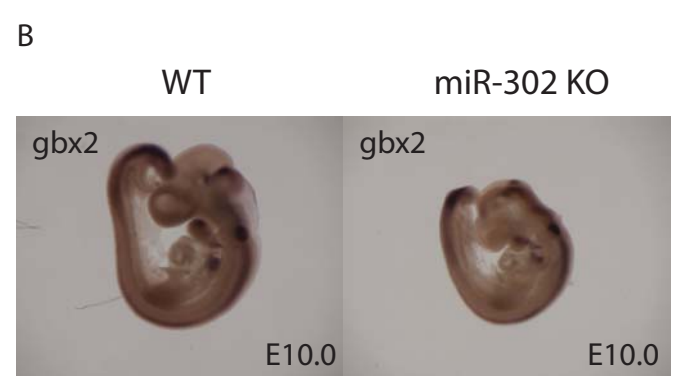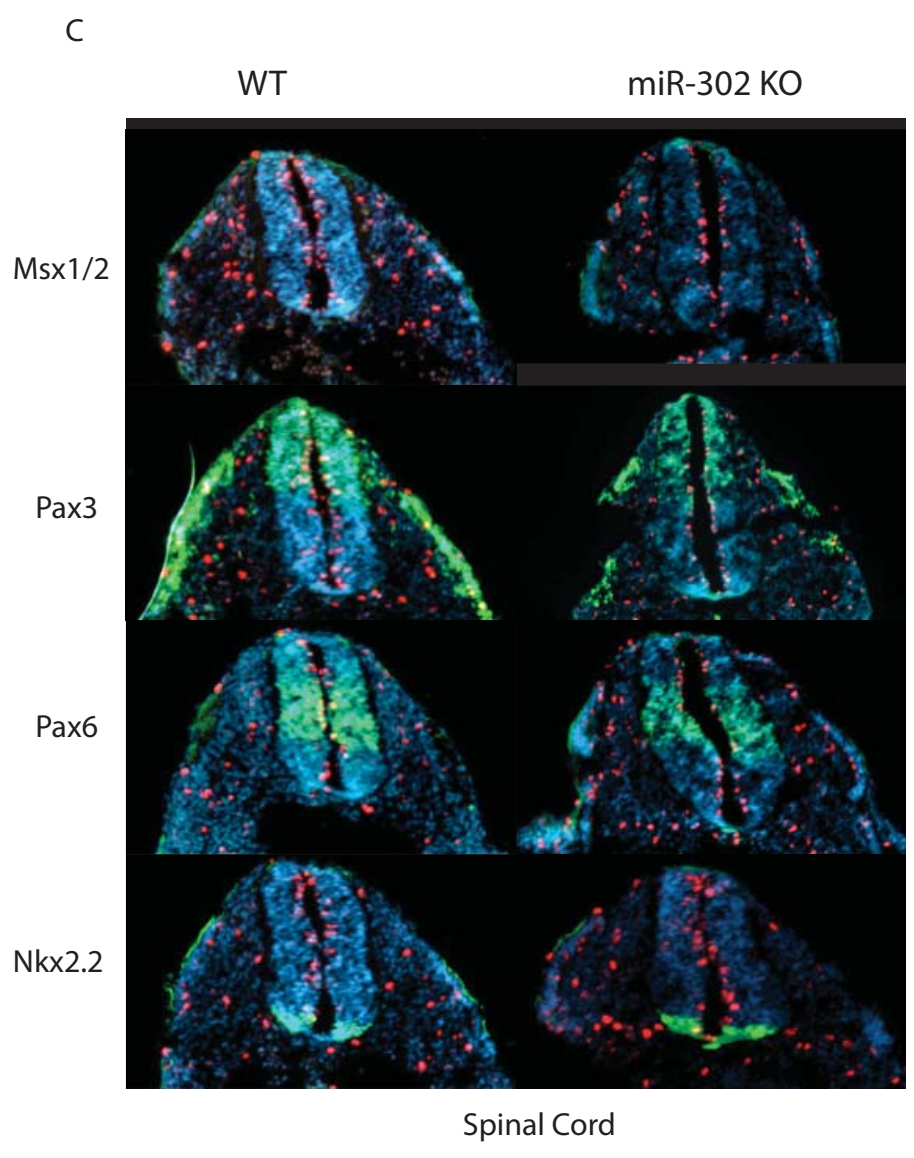

**Figure 4-supplement figure 2:** Patterning of miR-302 knockout embryos. **(A)** In situ hybridization staining for FoxG1, En-2, and Krox-20 in wild-type and knockout embryos at indicated developmental stages. **(B)** In situ hybridization staining for Gbx2 in wild-type and knockout embryos at E10.0. **(C)** Immunohistochemistry against Msx1/2, Pax3, Pax6, and Nkx2.2 in transverse sections of wild-type and knockout embryos just posterior to the hindbrain in the spinal cord.

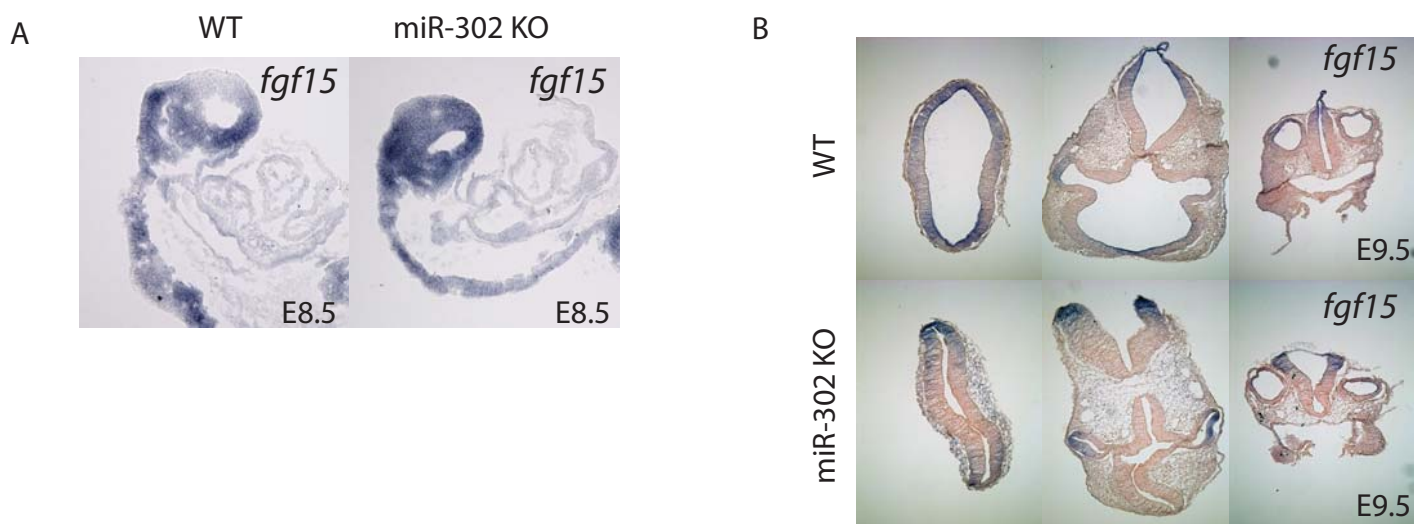

**Figure 6-supplement figure 1:** Overexpression of Fgf15 in miR-302 knockout embryos. (A) In situ hybridization staining for Fgf15 followed by sagittal sectioning in wild-type and knockout embryos at E8.5. (B) In situ hybridization staining for Fgf15 followed by transverse sectioning in wild-type and knockout embryos at E9.5.

Supplemental Experimental Procedures:

Table of qPCR Primers

| <b>Name/ID</b>           | <b>Primers</b>           | <b>Primer Sequence</b>                                                             |
|--------------------------|--------------------------|------------------------------------------------------------------------------------|
| mmu-miR-302b-3p          | 302b                     | TAAGTGCTTCCATGTTTTAGTAG                                                            |
| mmu-miR-302c-3p          | 302c                     | AAGTGCTTCCATGTTTCAGTGG                                                             |
| mmu-miR-302a-3p          | 302a                     | TAAGTGCTTCCATHTTTTGGTGA                                                            |
| mmu-miR-302d-3p          | 302d                     | TAAGTGCTTCCATGTTTGAGTGT                                                            |
| mmu-miR-367-3p           | 367                      | AATTGCACTTTAGCAATGGTGA                                                             |
| mmu-miR-290a-5p          | 290a                     | ACTCAAACACTATGGGGGCACTTT                                                           |
| mmu-miR-290b-3p          | 290b                     | AAGTGCCCCCATAGTTTGAGTA                                                             |
| mmu-miR-291a-5p          | 291a                     | CATCAAAGTGGAGGCCCTCTCT                                                             |
| mmu-miR-292-3p           | 292                      | AAAGTGCCGCCAGGTTTTGAGTGT                                                           |
| mmu-miR-292b-3p          | 292b                     | AAGAGCCCCCAGTTTGAGTAT                                                              |
| mmu-miR-291b-5p          | 291b                     | GATCAAAGTGGAGGCCCTCTCC                                                             |
| mmu-miR-293-3p           | 293                      | AGTGCCGCAGAGTTTGTAGTGT                                                             |
| mmu-miR-294-3p           | 294                      | AAAGTGCTTCCCTTTTGTGTGT                                                             |
| mmu-miR-295-3p           | 295                      | AAAGTGCTACTACTTTTTGAGTCT                                                           |
| mmu-let-7c-5p            | Let7c                    | TGAGGTAGTAGGTTGTATGGTT                                                             |
| mmu-let-7a-5p            | Let7a                    | TGAGGTAGTAGGTTGTATAGTT                                                             |
| mmu-let-7i-5p            | Let7i                    | TGAGGTAGTAGTTTGTGCTGTT                                                             |
| mmu-let-7g-5p            | Let7g                    | TGAGGTAGTAGTTTGTACAGTT                                                             |
| mmu-let-7f-5p            | Let7f                    | TGAGGTAGTAGATTGTATAGTT                                                             |
| mmu-let-7e-5p            | Let7e                    | TGAGGTAGGAGGTTGTATAGTT                                                             |
| 3'RACE Adaptor<br>sno202 | 3'RACE Adaptor<br>sno202 | GCGAGCACAGAATTAATACGACTCACTATAGGT <sub>12</sub> VN<br>GTACTTTTGAACCCTTTTCCATCTGATG |

#### **mRNA**

|         |                     |                         |
|---------|---------------------|-------------------------|
| Uchl1   | mmu_Uchl1_left      | AGCTGGAATTTGAGGATGG     |
|         | mmu_Uchl1_right     | CTCGAAACACTTGGCTCTATC   |
| Msrb2   | mmu_Msrb2_left      | AGCAAGGACACAGGGTCTC     |
|         | mmu_Msrb2_right     | CGCTTCAGTTCCTTTCTCTC    |
| Tnfaip1 | mmu_Tnfaip1_left    | AGCCAGAGGCACTGAGAG      |
|         | mmu_Tnfaip1_right   | CTGCAGGTAGATCACCACAC    |
| Ednrb   | mmu_Ednrb_left      | ATCCGCACGAGTTGGTCTC     |
|         | mmu_Ednrb_right     | CATGTTACAGCTTGCTCCTGTG  |
| Fgf15   | mmu_Fgf15_left_001  | ATATACGGGCTGATTTCGCTAC  |
|         | mmu_Fgf15_right_001 | GCCTAAACAGTCCATTTCTCTC  |
| Elavl2  | mmu_Elavl2_left     | CGCAGCAGCAGGTAATTG      |
|         | mmu_Elavl2_right    | GTCTTGCTGTCTCTGTGTTT    |
| Stau2   | mmu_Stau2_left      | TTCAGATAAATCAGCTTCTCTCC |
|         | mmu_Stau2_right     | CTATGGAAACGGGCTAACTC    |
| Cul1    | mmu_Cul1_left       | AAATCTTCTTAAGGATGGAG    |
|         | mmu_Cul1_right      | GTGTAGAACTTCAGGACACTC   |

|              |                   |                        |
|--------------|-------------------|------------------------|
| Lamp2        | mmu_Lamp2_left    | CTGTTCCCTAGGAGCCGTTT   |
|              | mmu_Lamp2_right   | GCAAGTACCCTTTGAATCTGTC |
| Med21        | mmu_Med21_left    | CTGTGAACTCGCTTGCCAG    |
|              | mmu_Med21_right   | CTGTAGGATTGGCTGGTTG    |
| Neurod4      | mmu_Neurod4_left  | CCCGGGAAAGAGAATCTATAC  |
|              | mmu_Neurod4_right | TCTCTCTTGCTCCTTCATCTC  |
| Dazap2       | mmu_Dazap2_left   | GAACAGCAAAGGTCAATATCC  |
|              | mmu_Dazap2_right  | CAGGTGGAGCATCAGTATAGG  |
| Rpl7         | mmu_Rpl7_left     | CTACTTGGGCGGAGAGAG     |
|              | mmu_Rpl7_right    | CAACTCTGCGAAATTCCTTC   |
| actin (ACTB) | mmu_actin_left    | CTAGGCACCAGGGTGTGATG   |
|              | mmu_actin_right   | GGCCTCGTCACCCACATAG    |
| GAPDH (GAPD) | mmu_GAPDH_left    | CAGGAGAGTGTTTCCTCGTC   |
|              | mmu_GAPDH_right   | TTCACACCGACCTTCACC     |
